# Supplementary material for: Myricetin Possesses Potential Protective Effects on Diabetic Cardiomyopathy through Inhibiting IκBα/NFκB and Enhancing Nrf2/HO-1
Source: Oxid Med Cell Longev. 2017 Sep 24;2017:8370593. doi: 10.1155/2017/8370593 (PMC5632894; doi:10.1155/2017/8370593)

Figure S1. Myricetin promoted the nuclei translocation of NF-κB as showed by immunofluorescence. Green represented the p-p65, blue represented the nuclei staining with DAPI, the merged pictures presented the location of NF-κB.

Figure S2. Myricetin promoted the nuclei translocation of Nrf2 in mouse heart as showed by immunofluorescence. Green represented the cardiac troponin T (TnT), Red represented the Nrf2, blue represented the nuclei staining with DAPI, the merged pictures presented the location of Nrf.

Figure S3. Myricetin inhibited cardiomyocytes apoptosis as showed by immunofluorescence. Green represented the TUNEL positive signaling, blue represented the nuclei staining with DAPI, the merged pictures presented cardiomyocytes apoptosis.

Figure S4. Myricetin promoted the nuclei translocation of Nrf2 in NRCM as showed by immunofluorescence. Green represented the cardiac troponin T (TnT), Red represented the Nrf2, blue represented the nuclei staining with DAPI, the merged pictures presented the location of Nrf 2.


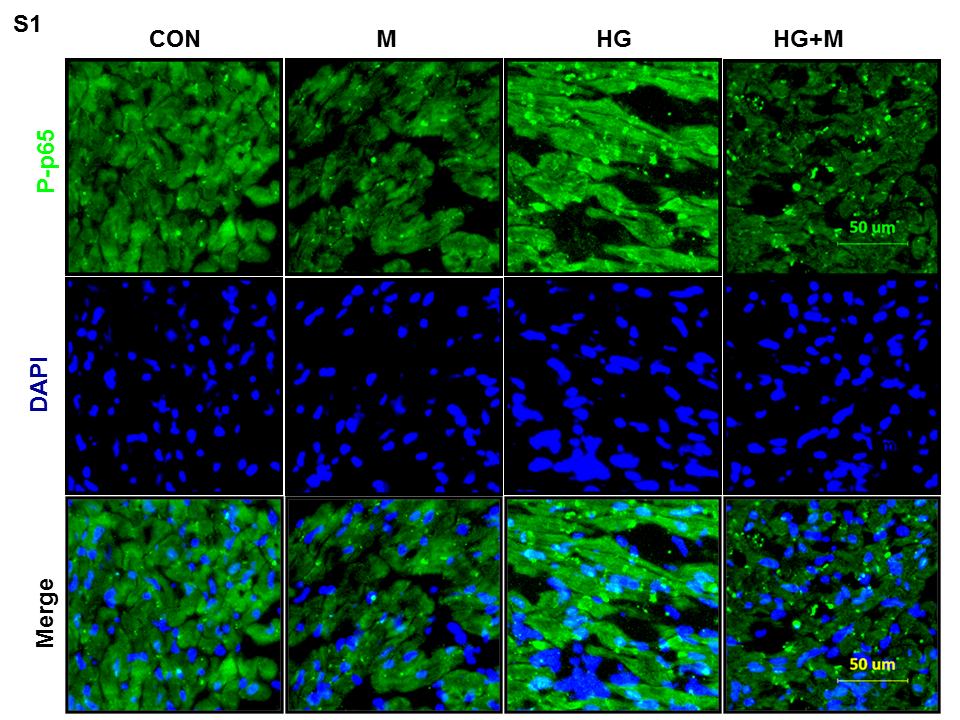


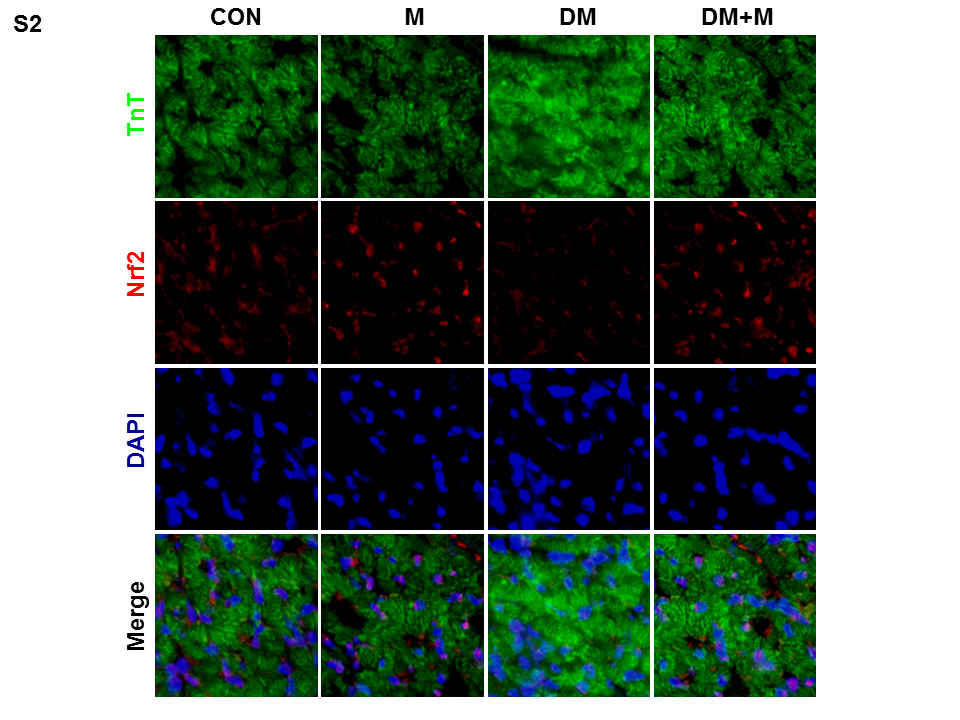


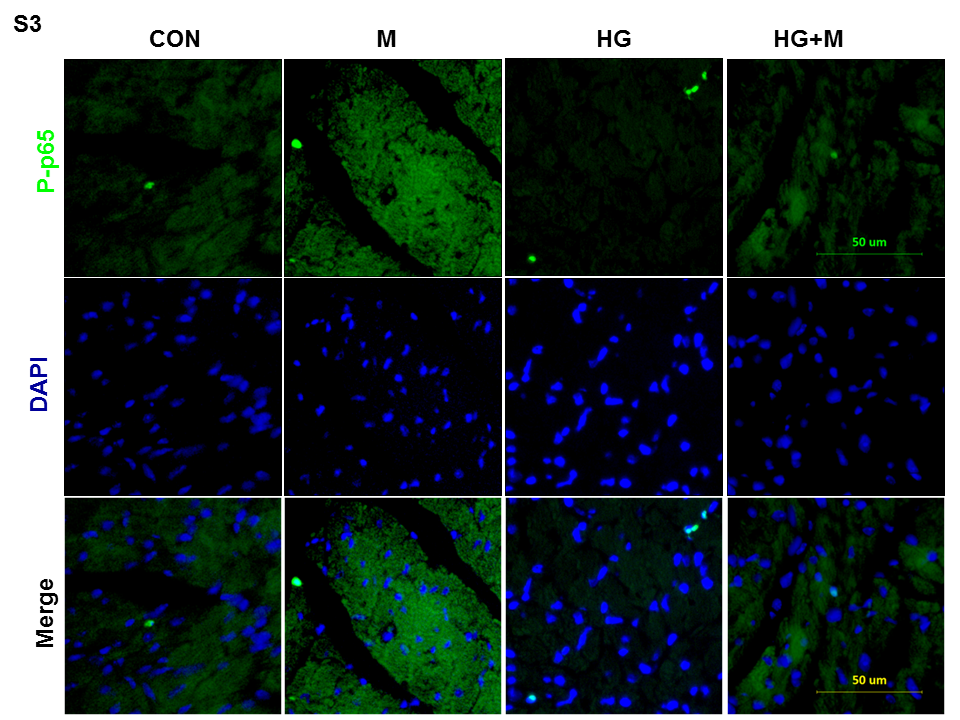


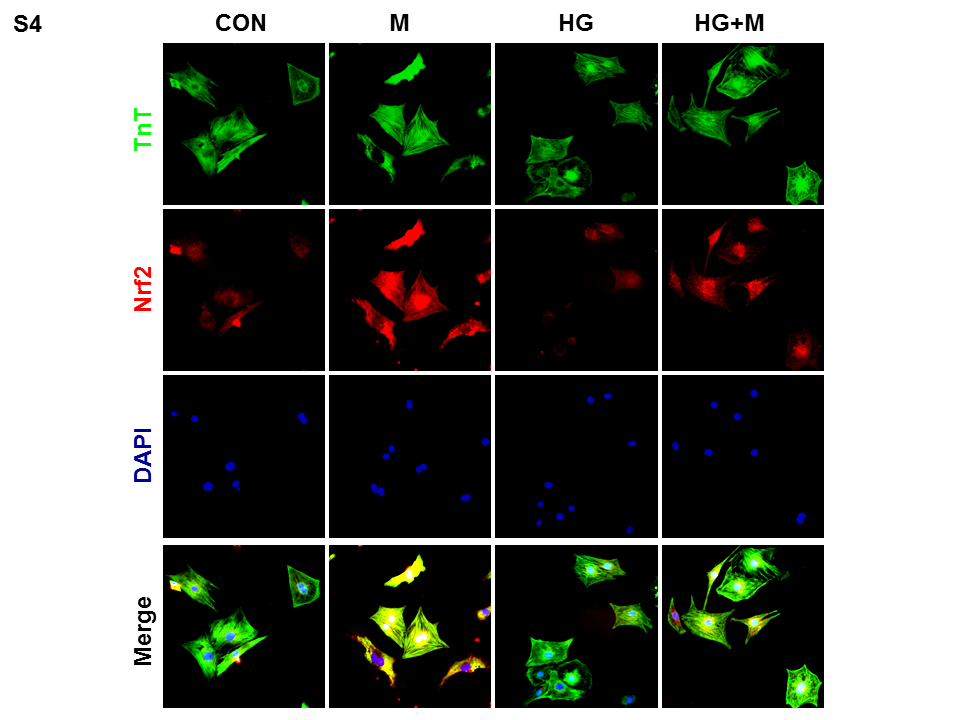

Supplement: Supplementary file 2 [file 8370593.f2.docx]
